# Supplementary material
Source: Royal Society of Chemistry journal article supplement (doi:10.1039/d6fb00090h)
Supplement: d6fb00090h1.pdf [file d6fb00090h1.pdf]

## Encapsulation of Lime Extract from By-Products in Zein–Pectin Microparticles for Gluten-Free Vegan Pancakes

Sandra Mariño-Cortegoso<sup>\*a,b</sup>, Roberta Tolve<sup>\*c</sup>, Ana Rodríguez-Bernaldo de Quirós<sup>a,b</sup>, Raquel Sendón<sup>a,b</sup>, Fabio Favati<sup>c</sup>, Letricia Barbosa-Pereira<sup>\*a,b</sup>

Corresponding authors: [sandra.marino.cortegoso@usc.es](mailto:sandra.marino.cortegoso@usc.es) ; [roberta.tolve@univr.it](mailto:roberta.tolve@univr.it) ; [leticia.barbosa.pereira@usc.es](mailto:leticia.barbosa.pereira@usc.es)

a)

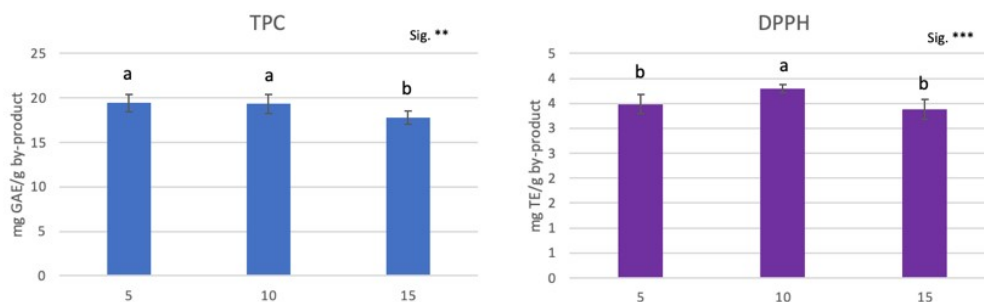

b)

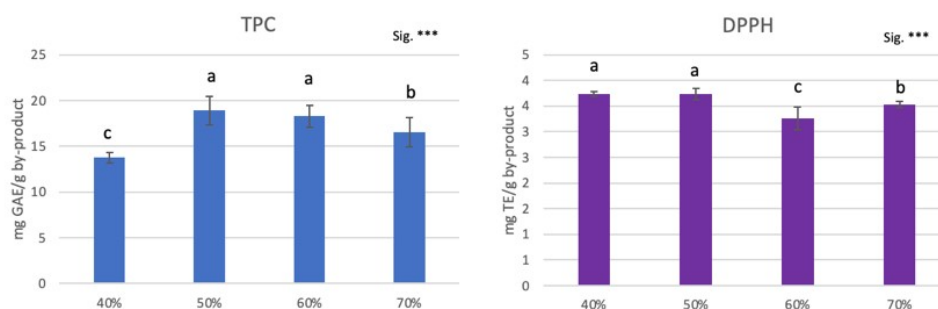

Statistical significance: \*\*\*p < 0.001; \*\*p < 0.01; \*p < 0.05; and n.s. = not significant (p > 0.05). Lowercase letters indicate statistical differences.

**Figure S1.** Optimization of polyphenolic extraction from lime by-products, evaluated through the determination of total phenolic content (TPC) and antioxidant activity assessed by the DPPH radical scavenging assay. Effects of ultrasound-assisted extraction (UAE) time (a) and ethanol:water (EtOH:H<sub>2</sub>O) solvent ratio (b).

**Table S1.** Experimental conditions optimized for the drying process using nano spray drying (NSD).

| Nº | Sample      | Nozzle          | Flow (L/min) | T <sup>inlet</sup> (°C) | T <sup>outlet</sup> (°C) | P (mbar) | Pump (%) | Spray (%) |
|----|-------------|-----------------|--------------|-------------------------|--------------------------|----------|----------|-----------|
| 1C | Control     | Medium (5.5 µm) | 170          | 110                     | 42 - 49                  | 59       | 80       | 80        |
| 1S | Lime-loaded | Medium (5.5 µm) | 170          | 110                     | 36 - 43                  | 58       | 80       | 80        |
| 2C | Control     | Medium (5.5 µm) | 130          | 110                     | 41 - 42                  | 40       | 80       | 80        |
| 2S | Lime-loaded | Medium (5.5 µm) | 130          | 110                     | 36 - 42                  | 40       | 80       | 80        |
| 3C | Control     | Medium (5.5 µm) | 150          | 110                     | 33 - 43                  | 51       | 80       | 80        |
| 3S | Lime-loaded | Medium (5.5 µm) | 150          | 110                     | 50 - 43                  | 49       | 80       | 80        |
| 4C | Control     | Medium (5.5 µm) | 150          | 120                     | 41 - 52                  | 50       | 80       | 80        |
| 4S | Lime-loaded | Medium (5.5 µm) | 150          | 120                     | 40 - 50                  | 51       | 80       | 80        |
| 5C | Control     | Medium (5.5 µm) | 150          | 100                     | 36 - 46                  | 51       | 80       | 80        |
| 5S | Lime-loaded | Medium (5.5 µm) | 150          | 100                     | 38 - 46                  | 48       | 80       | 80        |

**Table S2.** Results obtained from the drying optimization in terms of production yield, antioxidant properties and quantification of phenolic compounds.

| Nº | Production |        | Antioxidant capacity (DPPH) |                           | Phenolic compounds ( $\mu\text{g/g}$ ) |              |            |           |            |        |
|----|------------|--------|-----------------------------|---------------------------|----------------------------------------|--------------|------------|-----------|------------|--------|
|    | Yield (%)  | mg/min | mgTE/g                      | Sample - control (mgTE/g) | Chlorogenic acid                       | Ferulic acid | Eriocitrin | Narirutin | Hesperidin | Rutin  |
| 1C | 93.03      | 2.36   | 2.40                        |                           |                                        |              |            |           |            |        |
| 1S | 88.37      | 3.79   | 5.25                        | 2.85                      | 149.90                                 | 19.99        | 4,681.93   | 844.37    | 547,001.78 | 553.93 |
| 2C | 82.92      | 3.39   | 2.62                        |                           |                                        |              |            |           |            |        |
| 2S | 92.22      | 3.67   | 5.66                        | 3.44                      | 179.65                                 | 35.32        | 5,559.68   | 941.78    | 621,413.46 | 660.20 |
| 3C | 89.47      | 2.77   | 2.70                        |                           |                                        |              |            |           |            |        |
| 3S | 89.79      | 4.23   | 5.44                        | 2.73                      | 157.45                                 | 11.02        | 4,502.73   | 799.22    | 520,490.33 | 537.20 |
| 4C | 91.09      | 2.36   | 3.03                        |                           |                                        |              |            |           |            |        |
| 4S | 94.27      | 3.36   | 5.40                        | 2.37                      | 169.44                                 | 22.97        | 5,223.02   | 902.03    | 579,163.11 | 607.23 |
| 5C | 90.10      | 2.83   | 3.15                        |                           |                                        |              |            |           |            |        |
| 5S | 86.17      | 2.44   | 5.65                        | 2.50                      | 164.33                                 | 29.22        | 4,754.28   | 858.13    | 561,411.43 | 581.82 |

Numbers followed by a C refer to control particles, while those followed by S refer to lime-loaded samples.
